# Supplementary material for: Photodynamic Therapy for X-ray-Induced Radiation-Resistant Cancer Cells
Source: MDPI journal article supplement (doi:10.3390/pharmaceutics15112536), 2023-10-26
Supplement: s1 [file s1]

## Supplementary Materials

A

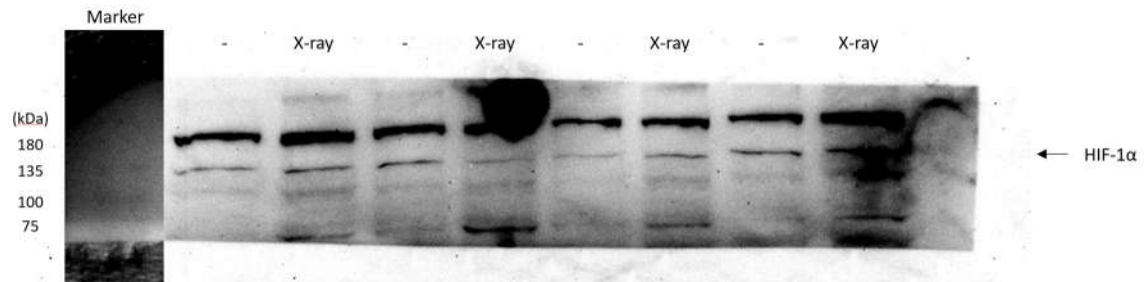

B

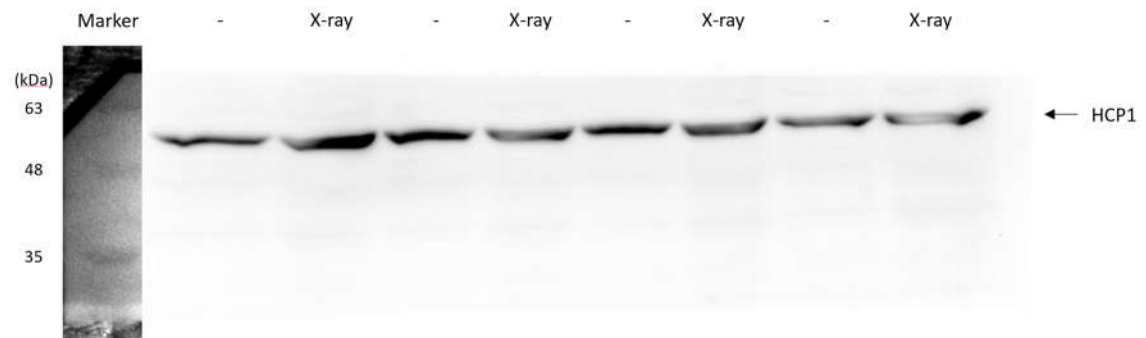

C

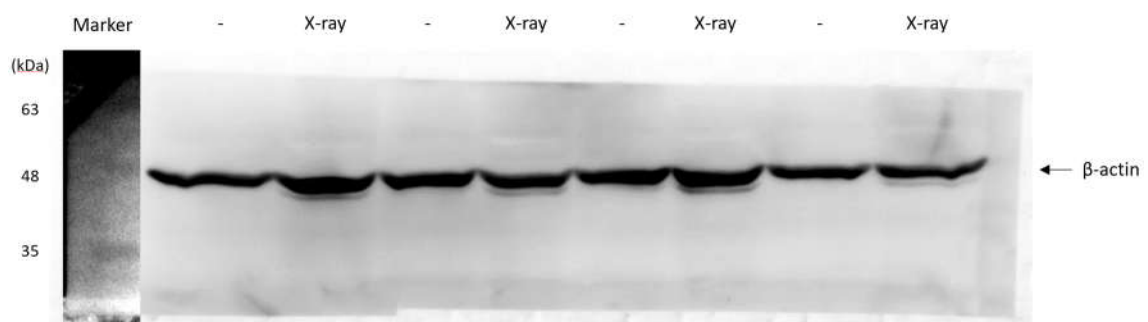

**Figure S1.** Uncropped Western blot figures of (A) HIF-1 $\alpha$ , (B) HCP1, and (C)  $\beta$ -actin.
